# Supplementary material for: RNA Polymerase II Stalling Promotes Nucleosome Occlusion and pTEFb Recruitment to Drive Immortalization by Epstein-Barr Virus
Source: PubMed Central journal article supplement (PMC3203192; doi:10.1371/journal.ppat.1002334), 2011-10-27

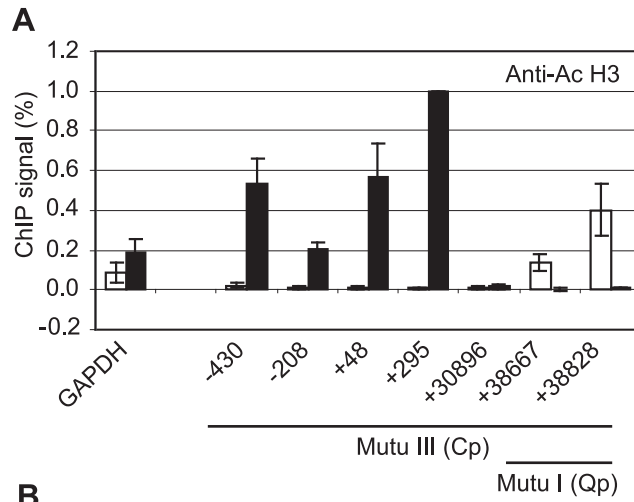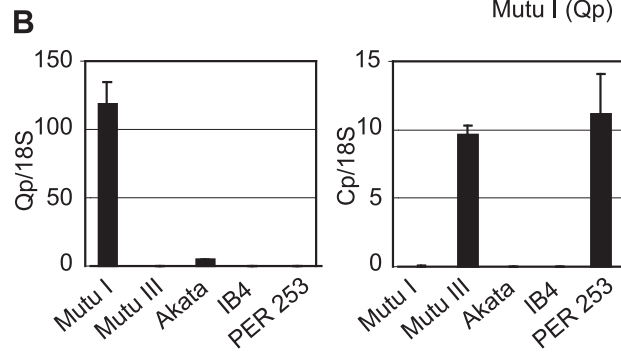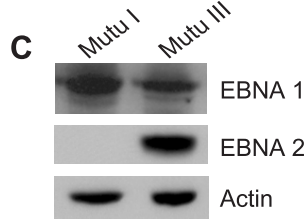

Supplement: ppat.1002334.s002.pdf [file ppat.1002334.s002.pdf]
