# Supplementary material for: RNA Polymerase II Stalling Promotes Nucleosome Occlusion and pTEFb Recruitment to Drive Immortalization by Epstein-Barr Virus
Source: PubMed Central journal article supplement (PMC3203192; doi:10.1371/journal.ppat.1002334), 2011-10-27
Supplement: ppat.1002334.s012.pdf [file ppat.1002334.s012.pdf]

| Name                                          | Location <sup>a</sup>                      | B95-8 sequence number <sup>b</sup> | Sequence (5' to 3')         |
|-----------------------------------------------|--------------------------------------------|------------------------------------|-----------------------------|
| <i>Cp primer sets</i>                         |                                            |                                    |                             |
| Forward (MW 428)                              | -1409 to -1392                             | 9926 to 9943                       | GGAGGAAGTCATGCCACA          |
| Reverse (MW 429)                              | -1310 to -1293                             | 10025 to 10042                     | AGGAACCTGTGGCACCTG          |
| Forward (MW 70)                               | -430 to -410                               | 10905 to 10925                     | CCTAGGCCAGCCAGAGATAAT       |
| Reverse (MW 71)                               | -356 to -337                               | 10979 to 10998                     | AGATAGCACTCGACGCACTG        |
| Forward (MW 133)                              | -208 to -189                               | 11127 to 11146                     | ACCTTAGAGGTGGAGCAACG        |
| Reverse (MW 134)                              | -114 to -96                                | 11221 to 11240                     | GGCGAATTAAGTACTGAGCTTGC     |
| Forward (MW 432)                              | -107 to -89                                | 11228 to 11246                     | CAGTTAATTCGCCACGAC          |
| Reverse (MW 433)                              | -23 to -2                                  | 11312 to 11333                     | AATTTGCAGCAGAACACAGAGT      |
| Forward (MW 155)                              | +48 to +67                                 | 11383 to 11402                     | CATCGCAGGGTCTTACCAT         |
| Reverse (MW 156)                              | +148 to +167                               | 11483 to 11502                     | CCTCAGGAGGCCCTTAGACT        |
| Forward (MW 157)                              | +295 to +313                               | 11630 to 11649                     | GAAGAAACAGCCTCCTGCAC        |
| Reverse (MW 158)                              | +387 to +406                               | 11722 to 11741                     | TTCAGTGCCCAGATTCATGT        |
| Forward (MW 274)                              | +2590 to +2605 (first repeat) <sup>c</sup> | 13925 to 13940 <sup>c</sup>        | CCAGGCCTGCCAAAGA            |
| Reverse (MW 275)                              | +2636 to +2654 (first repeat) <sup>c</sup> | 13971 to 13989 <sup>c</sup>        | CTGTTACTGCACCCGCTTT         |
| Forward (MW 226)                              | +30896 to +30916 <sup>d</sup>              | 42231 to 42251                     | GCGTTATCATGTGTTGCTTGA       |
| Reverse (MW 227)                              | +30973 to +30994 <sup>d</sup>              | 42308 to 42329                     | AGATCCACATGTTGCGGTGTG       |
| Forward (MW 280)                              | +38667 to +38686                           | 50002 to 50021                     | CTGTCACCACCTCCCTGATA        |
| Reverse (MW 281)                              | +38712 to +38731                           | 50047 to 50066                     | GAACACTCCCTCAGTGGTCA        |
| Forward (MW 282)                              | +38828 to +38847                           | 50163 to 50182                     | GATGGCGGGTAATACATGCT        |
| Reverse (MW 283)                              | +38903 to +38922                           | 50238 to 50257                     | CAAACATACACCGTGCAGAA        |
| Forward (MW 288)                              | +40493 to +40512                           | 51828 to 51847                     | TCGAAAGACTCGGAGTAGCC        |
| Reverse (MW 289)                              | +40542 to +40557                           | 51878 to 51892                     | TCCCTGGTGGAGACC             |
| Forward (MW 290)                              | +50024 to +50044                           | 61359 to 61379                     | GACCCATAGCAGAGACCTGAG       |
| Reverse (MW 291)                              | +50071 to +50088                           | 61407 to 61423                     | CGGCCGAGTATGAGCAG           |
| Forward (MW 161)                              | +59014 to +59033                           | 70349 to 70368                     | TGAGGCATCCGATATGACTG        |
| Reverse (MW 162)                              | +59083 to +59104                           | 70418 to 70439                     | CTCCACCTGTGTAACCTCACTG      |
| Forward (MW 266)                              | +75615 to +75634                           | 86950 to 86969                     | AACTGTGTGGCTCTCTGCAC        |
| Reverse (MW 267)                              | +75696 to +75714                           | 87031 to 87049                     | TTGCAGCTGGACATGACAC         |
| <i>LMP2A / (LMP1) primer sets<sup>e</sup></i> |                                            |                                    |                             |
| Forward (MW 357)                              | -268 to -246                               | 165771 to 165793                   | GATAGCCTCGCGACTCGTGGGAA     |
| Reverse (MW 358)                              | -205 to -185                               | 165834 to 165854                   | AATCTTCACACACTGCTGCTG       |
| Forward (MW 526)                              | -50 to -30                                 | 165991 to 166011                   | CGGTTTCAGCATCACAGGT         |
| Reverse (MW 527)                              | +12 to +34                                 | 166051 to 166073                   | GAAATGCTCTCTGAGAAACAAGG     |
| Forward (MW 359)                              | +150 to +170                               | 166189 to 166209                   | CCAATATCCATCTGCTTCTGG       |
| Reverse (MW 360)                              | +208 to +231                               | 166247 to 166270                   | GGCTCTTCATTAGATTCACGTTT     |
| Forward (MW 361)                              | +381 to +406 (+2637 to +2611) <sup>f</sup> | 166420 to 166446                   | CTCATCTCAACACATATATGAAGAAGC |
| Reverse (MW 362)                              | +451 to +472 (+2567 to +2546)              | 166490 to 166511                   | TTGATGTGACTTGTGATGCAAT      |
| Forward (MW 144)                              | +695 to +712 (+2323 to +2306)              | 166734 to 166751                   | GGACACGCTCCTTCTTGG          |
| Reverse (MW 143)                              | +759 to +780 (+2259 to +2238)              | 166798 to 166819                   | ACTGGCTGGATTCTACGCTACT      |
| Forward (MW 150)                              | +1346 to +1367 (+1672 to +1651)            | 167385 to 167406                   | GTGTTGTGCAGAGGTCTGATG       |
| Reverse (MW 149)                              | +1435 to +1454 (+1583 to +1564)            | 167474 to 167493                   | CCTTCACACACCACACAGGT        |
| Forward (MW 148)                              | +2361 to +2381 (+657 to +637)              | 168400 to 168420                   | TGAGCAGGATGAGGTCTAGGA       |
| Reverse (MW 147)                              | +2424 to +2444 (+594 to +574)              | 168463 to 168483                   | GGAGATTCTCTGGCGACTTG        |
| Forward (MW 140)                              | +2878 to +2898 (+140 to +120)              | 168917 to 168937                   | AGAGGAGGAGAAGGAGAGCAA       |
| Reverse (MW 139)                              | +2966 to +2984 (+52 to +34)                | 169005 to 169023                   | CCTGAGGATGGAACACGAC         |
| Forward (MW 311)                              | +3249 to +3266 (-231 to -248)              | 169288 to 169305                   | GGCCAAGTGCAACAGGAA          |
| Reverse (MW 310)                              | +3315 to +3335 (-297 to -317)              | 169354 to 169374                   | GCAGATTACACTGCCGCTTC        |

|                              |                                 |                        |
|------------------------------|---------------------------------|------------------------|
| <i>OriP primer set</i>       |                                 |                        |
| Forward (MW 617)             | 7036 to 7055                    | GGAGGAGAAGAGAGGCTTCC   |
| Reverse (MW 618)             | 7106 to 7125                    | AATAGCGGACAAGCCGAATA   |
| <br>                         |                                 |                        |
| <i>GAPDH primer set</i>      |                                 |                        |
| Forward (MW 208)             | +1948 to +1968                  | CTCATGCCTTCTTGCCTCTT   |
| Reverse (MW 209)             | +2027 to +2048                  | TTGATGGCAACAATATCCACTT |
| <br>                         |                                 |                        |
| <i>Actin cDNA primer set</i> |                                 |                        |
| Forward (MW 418)             | 5568881 to 5568901 <sup>g</sup> | CTGGCACCACACCTTCTACA   |
| Reverse (MW 419)             | 5568314 to 5568294              | TTGCTATCCAGGCTGTGCTA   |

---

---
